# Supplementary material
Source: publisher figshare collection journal article supplement (https://tandf.figshare.com/articles/dataset/_/6283085)
Supplement: Supplementary file 1 [file 1]

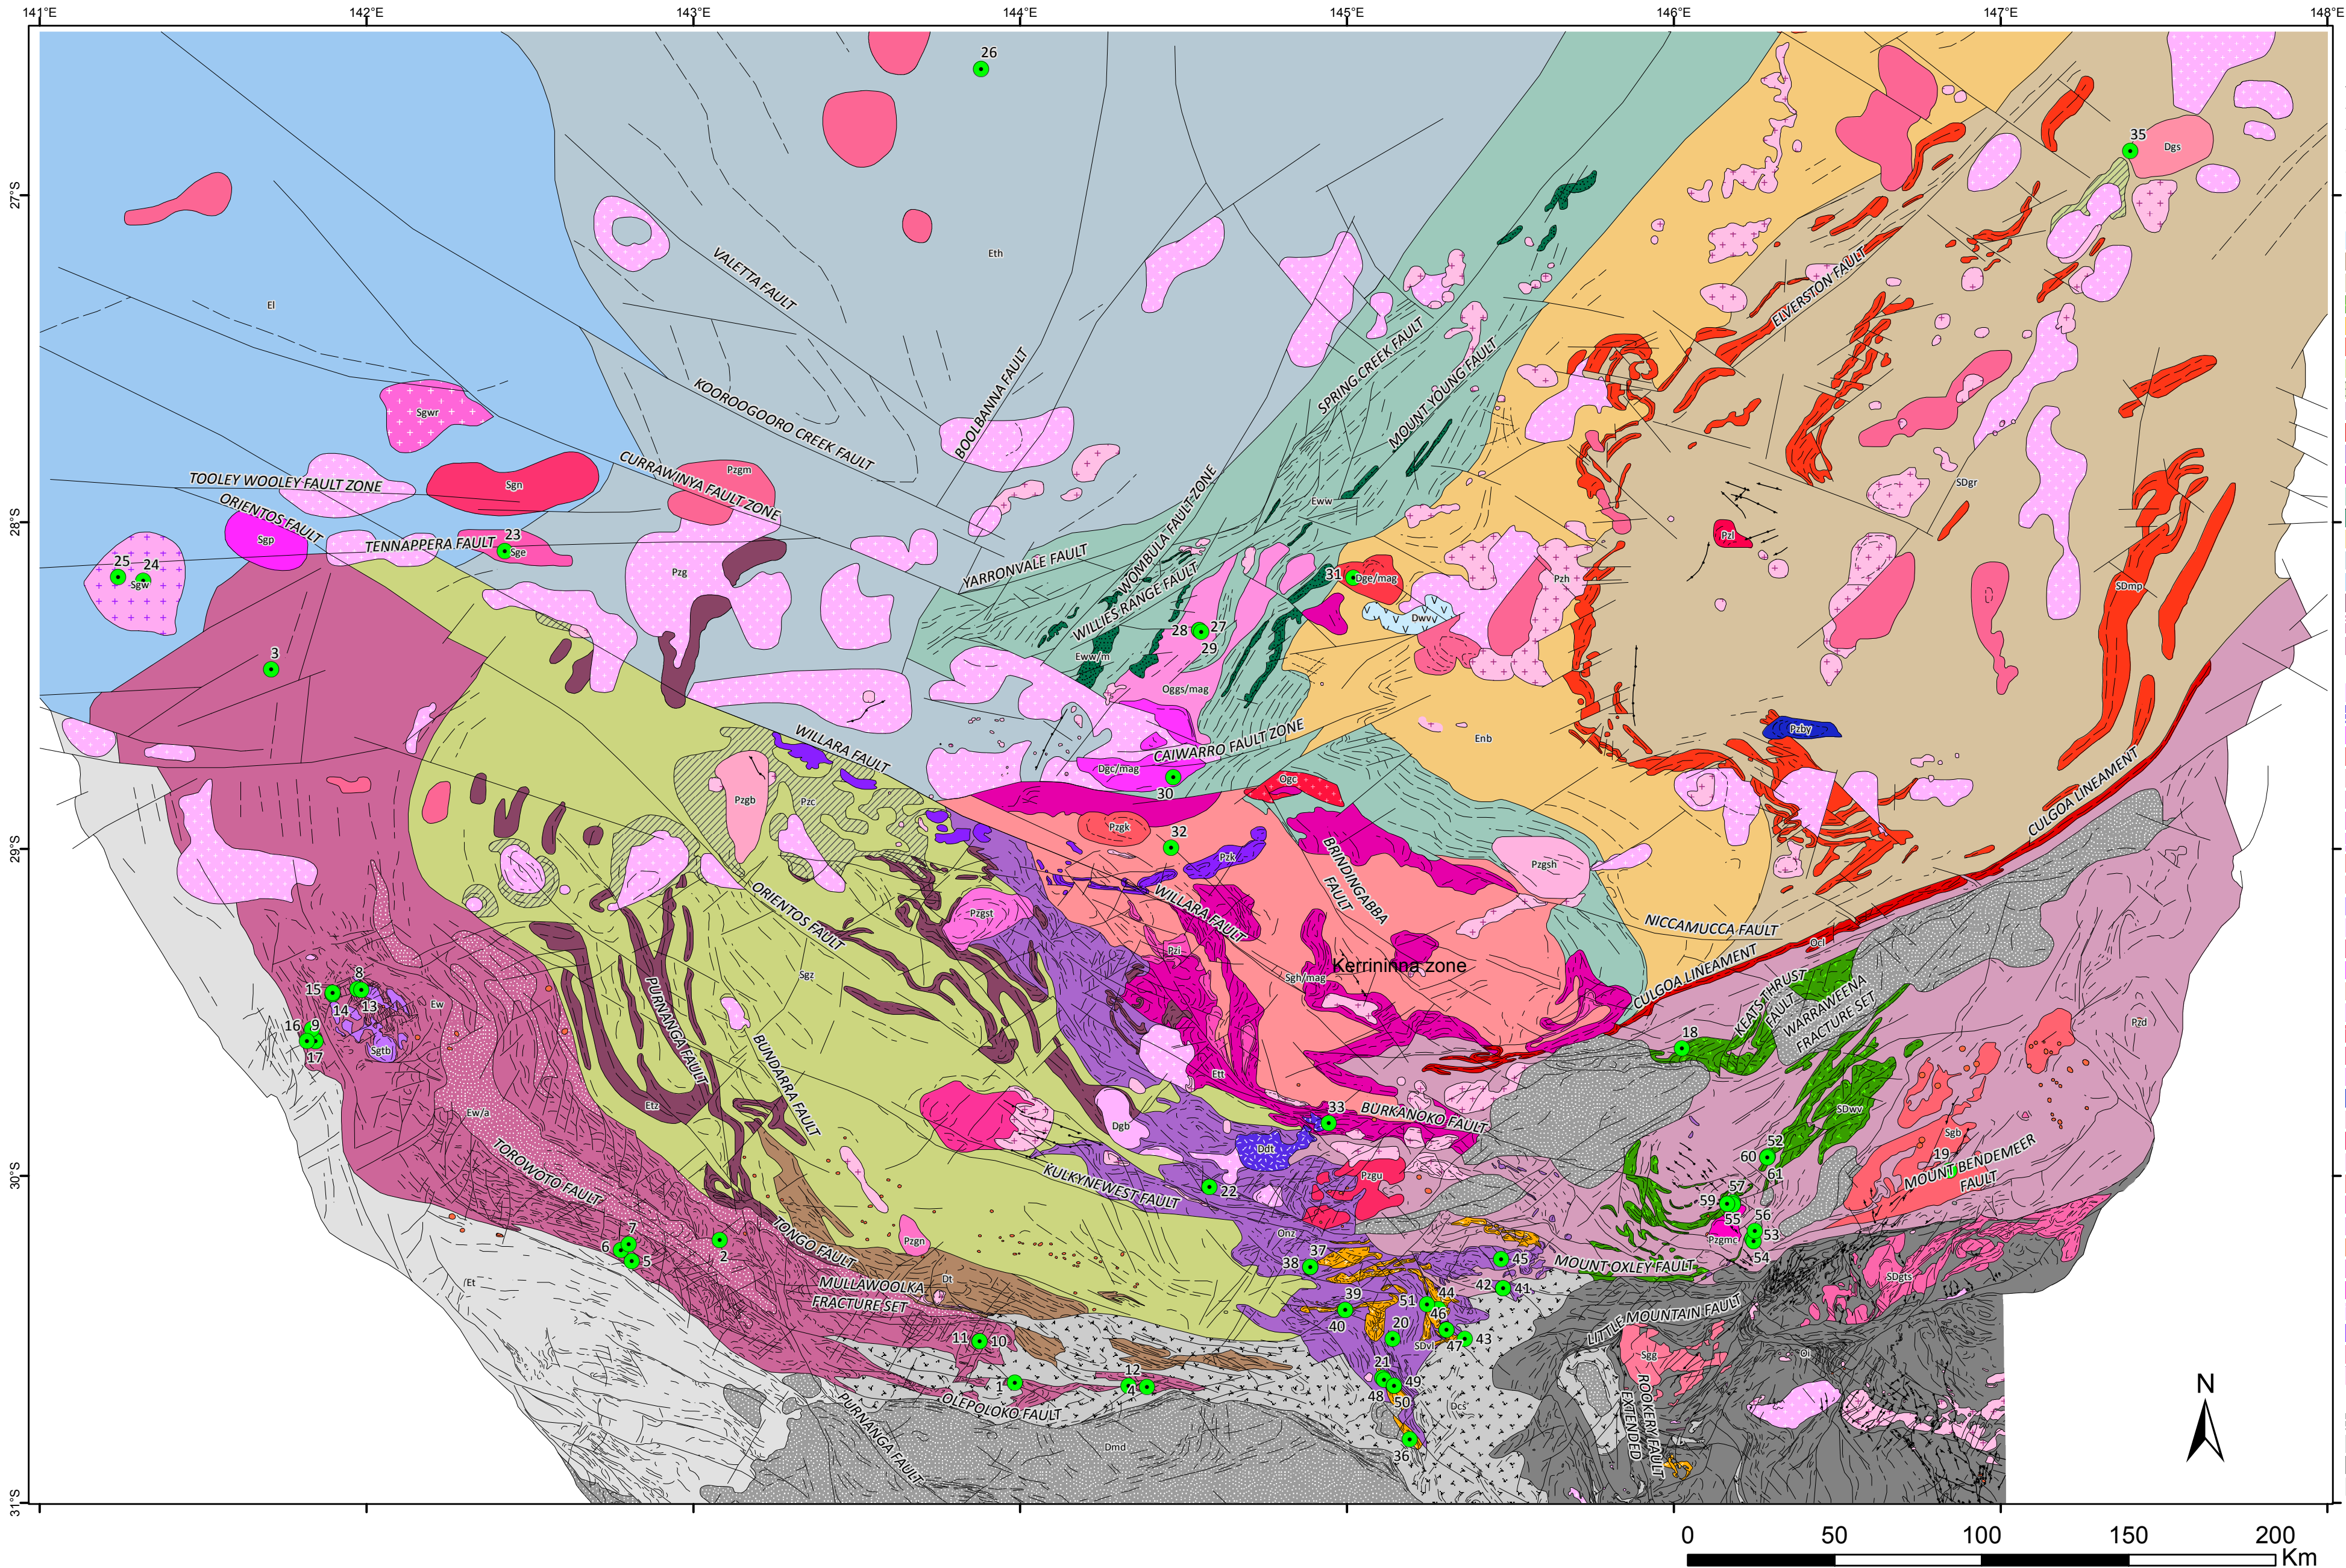

Legend

- Age Constraints
- Dyke or Vein
- Fault
- Geological Boundary
- - - Igneous Boundary
- - - Joint Pattern
- - - Trend Line

Thomson Orogen

- Waihora Volcanics (Dwv)
- Tongo Formation (Dt)
- Glenroy Formation (SDgr)
- Warraweena Volcanics (SDwv)
- Louth Volcanics (SDvl)
- Minoru Plains zone (SDmp)
- Gumbalara zone (Sgz)
- Contact metamorphic aureoles (Pzc)
- Gumbercoo zone (Sgz)
- Culgoa zone (Ocl)
- Nangunyah zone (Onz)
- Twin Tanks Metamorphics (Ett)
- Werewilka Formation (Eww)
- Werewilka Formation/m (Eww/m)
- Nebine Metamorphics (Enb)
- Thomson beds (Eth)
- Lycosa Formation (El)
- Torowoko zone (Etz)
- Warratta Group/a (Ew/a)
- Warratta Group (Ew)

Intrusions

- Barrona Granite (Dgb)
- Tinchelooka Diorite (Ddt)
- Currawinya Granite/mag (Dgc/mag)
- Eulo Granite/mag (Dge/mag)
- Scalby Granite (Dgs)
- Tarcoon Suite (SDgts)
- Ella Granite (Sge)
- Wirrega Granite (Sgwr)
- Brewarrina Granite (Sgb)
- Galambo Granite (Sgg)
- Tibooburra Suite (Sgtb)
- Wollgolla Granite (Sgw)
- Noccundra Granite (Sgn)
- Patrolclus Granodiorite (Sgp)
- Hungerford Granite/mag (Sgh/mag)
- Granite Springs Granite/mag (Oggs/mag)
- Cumbooromon Bore Granite (Ogc)
- Utah Lake Suite (Pzgu)
- Stevens Tank Granite (Pzgst)
- Yankalilla Gabbro (Pzby)
- Burtens Tank Granite (Pzgb)
- Layered intrusion (Pzl)
- Sharoon Granite (Pzgsh)
- Karratta Bore Granite (Pzgbk)
- Myrong Granite (Pzgm)
- Nantilla intrusion (Pzgn)
- Diatremes (Pzd)
- Intermediate igneous rocks (Pzi)
- Mooculta Granite (Pzgm)
- Non magnetic intrusion (Pzg)
- Kerrinina zone (Pzk)
- Moderately magnetic intrusion (Pzgm)
- Highly magnetic intrusion (Pzh)

Other

- Mulga Downs Group (Dmd)
- Cobar Supergroup (Dcs)
- Girilambone Group (Oi)
- Teltawongee Group (Et)
