# Supplementary material
Source: publisher figshare collection journal article supplement (https://tandf.figshare.com/articles/dataset/_/6283085)
Supplement: Supplementary file 2 [file 1]

## Basement geology of the southern Thomson Orogen

D. J. Purdy<sup>a</sup>, R. Hegarty<sup>b</sup> and M. P. Doublier<sup>c</sup>

<sup>a</sup>Geological Survey of Queensland, Queensland Department of Natural Resources and Mines, PO Box 15261, City East, QLD 4002, Australia

<sup>b</sup>Geological Survey of New South Wales, NSW Department of Planning and Environment, PO Box 344, Hunter Region MC, NSW 2310, Australia

<sup>c</sup>Geoscience Australia, GPO Box 378, Canberra, ACT 2601, Australia

\* e-mail: [david.purdy@dnrme.qld.gov.au](mailto:david.purdy@dnrme.qld.gov.au)

### SUPPLEMENTARY PAPERS

*Australian Journal of Earth Sciences* (2018) 65,

<https://doi.org/10.1080/08120099.2018.1453547>

---

Copies of Supplementary Papers may be obtained from the Geological Society of Australia's website ([www.gsa.org.au](http://www.gsa.org.au)), the Australian Journal of Earth Sciences website ([www.ajes.com.au](http://www.ajes.com.au)) or from the National Library of Australia's Pandora archive (<http://nla.gov.au/nla.arc-25194>).

---

### Supplementary papers

Appendix 1. Compilation of U–Pb geochronology across the southern Thomson Orogen region.

Figure A1. Interpretive basement geology map of the southern Thomson Orogen. This is also included as symbolised shapefiles in an ArcGIS map package.

Appendix 1. Compilation of U–Pb geochronology across the southern Thomson Orogen region.

| Drill hole/sample no. | Depth (m)     | Rock type      | Unit                             | Long.    | Lat.     | Age (Ma)    | Type | Method    | Reference                                      |
|-----------------------|---------------|----------------|----------------------------------|----------|----------|-------------|------|-----------|------------------------------------------------|
| (1) F03D02            | 481.4–482     | Metasediment   | Warratta Gp.                     | 143.9837 | -30.6321 | 498.8 ± 3.4 | MDA  | SHRIMP    | Armistead & Fraser (2015)                      |
| (2) F16RMD08-01       | 373–374       | Metasediment   | Warratta Gp.                     | 143.0801 | -30.1963 | 503 ± 6     | MDA  | LA-ICP-MS | Glen et al. (2010; 2013)                       |
| (3) DIO Naryilco 1    | 1474.3–1477.4 | Metasediment   | Warratta Gp.                     | 141.7076 | -28.4496 | 496 ± 16    | MDA  | SHRIMP    | Purdy et al. (2016)                            |
| (4) CBRCD01/CutAD1    | 115.24–116.24 | Metasediment   | Warratta Gp.                     | 144.3881 | -30.6449 | 501.5 ± 6   | MDA  | LA-ICP-MS | Glen et al. (2010; 2013)                       |
| (5) YAN-001           | 85.75–87.60   | Metasediment   | Warratta Gp., Yancannia Fm.      | 142.8113 | -30.2608 | 497 ± 13    | MDA  | LA-ICP-MS | Wong et al. (2018, this issue)                 |
| (6) YAN-070           | Outcrop       | Metasediment   | Warratta Gp., Yancannia Fm.      | 142.7780 | -30.2270 | 555 ± 14    | MDA  | LA-ICP-MS | Wong et al. (2018, this issue)                 |
| (7) YAN-081           | Outcrop       | Metasediment   | Warratta Gp., Yancannia Fm.      | 142.8020 | -30.2090 | 527 ± 18    | MDA  | LA-ICP-MS | Wong et al. (2018, this issue)                 |
| (8) 2005844028        | Outcrop       | Volcaniclastic | Warratta Gp., Easter Monday Fm.  | 141.9714 | -29.4280 | 497.2 ± 2.6 | Mag. | SHRIMP    | Black (2006); Greenfield (2010)                |
| (9) 2005844066        | Outcrop       | Volcaniclastic | Warratta Gp., Jeffereys Flat Fm. | 141.8441 | -29.5879 | 510.4 ± 3   | MDA  | SHRIMP    | Black (2006); Greenfield (2010)                |
| (10) F1DD02           | 148.1–149.05  | Granite        | Unnamed intrusion                | 143.8747 | -30.5062 | 428.2 ± 3.1 | Mag. | SHRIMP    | Armistead & Fraser (2015)                      |
| (11) F1DD01           | 237.5–238.5   | Granitic dyke  | Unnamed intrusion                | 143.8758 | -30.5062 | 424.5 ± 4.9 | Mag. | SHRIMP    | Armistead & Fraser (2015)                      |
| (12) CUTACD02         | 404.7–406.5   | Quartz diorite | Unnamed intrusion                | 144.3309 | -30.6425 | 429.1 ± 8.5 | Mag. | SHRIMP    | Armistead & Fraser (2015)                      |
| (13) 2006844070       | Outcrop       | Granodiorite   | Tibooburra Granodiorite          | 141.9833 | -29.4305 | 420.6 ± 3.3 | Mag. | SHRIMP    | Black (2007); Vickery (2010)                   |
| (14) 2006844071       | Outcrop       | Diorite        | Dynamite Tank Granodiorite       | 141.8959 | -29.4438 | 420.2 ± 3.4 | Mag. | SHRIMP    | Black (2007); Vickery (2010)                   |
| (15) 2006844082       | Outcrop       | Granodiorite   | Dynamite Tank Granodiorite       | 141.8962 | -29.4400 | 427.7 ± 2.3 | Mag. | SHRIMP    | Black (2007); Vickery (2010)                   |
| (16) 2005844029       | Outcrop       | Granodiorite   | Warrata Gp.                      | 141.8321 | -29.5510 | 423.3 ± 2.1 | Mag. | SHRIMP    | Black (2006)                                   |
| (17) 2005844030       | Outcrop       | Granodiorite   | Warrata Gp.                      | 141.8170 | -29.5869 | 421.3 ± 2   | Mag. | SHRIMP    | Black (2006)                                   |
| (18) Bellfields-1A    | 402.5– 404    | Metasediment   | Gumbercoo zone?                  | 146.0248 | -29.6095 | 436.3 ± 2.7 | MDA  | SHRIMP    | Fraser et al. (2014)                           |
| (19) BRE-NGA-1        | Outcrop       | Granite        | Brewarrina Granite               | 146.8437 | -29.9836 | 420.9 ± 2.3 | Mag. | SHRIMP    | Bodorkos et al. (2013)                         |
| (20) DMR Woodlands    | 66.58–67m     | Metasediment   | Nangunyah zone                   | 145.1399 | -30.4984 | 492.7 ± 5.4 | MDA  | LA-ICP-MS | Glen et al. (2010; 2013)                       |
| (21) Louth DH5 (L5)   | 214.9         | Metasediment   | Nangunyah zone                   | 145.1075 | -30.6179 | 485.1 ± 7.4 | MDA  | LA-ICP-MS | Glen et al. (2010; 2013); Brunker (1968)       |
| (22) TFB002A          | 403.65–405.0  | Granite        | Conlea porphyry                  | 144.5795 | -30.0346 | 398.0 ± 2.8 | Mag. | SHRIMP    | Fraser et al. (2014)                           |
| (23) DIO Ella 1       | 1278          | Granite        | Ella Granite                     | 142.4226 | -28.0877 | 425.4 ± 6.6 | Mag. | SHRIMP    | Draper (2006), Cross et al. (2018, this issue) |

| Drill hole/sample no. | Depth (m)     | Rock type      | Unit                               | Long.    | Lat.     | Age (Ma)    | Type | Method     | Reference                                      |
|-----------------------|---------------|----------------|------------------------------------|----------|----------|-------------|------|------------|------------------------------------------------|
| (24) DIO Wolgolla 1   | 2040.4–2041.7 | Granite        | Wolgolla Granite                   | 141.3165 | -28.1788 | 418.8 ± 2.8 | Mag. | SHRIMP     | Siegel (2015); Siegel et al. (2018 this issue) |
| (25) TEA Roseneath 1  | 2192–2196     | Granite        | Wolgolla Granite                   | 141.2390 | -28.1679 | 419.4 ± 7   | Mag. | LA-ICP-MS  | Siegel (2015); Siegel et al. (2018 this issue) |
| (26) GSQ Eromanga 1   | 1259.4–1266.9 | Metasediment   | Thomson beds                       | 143.8801 | -26.6135 | 498 ± 16    | MDA  | SHRIMP     | Purdy et al. (2016)                            |
| (27) RJB3123          | Outcrop       | Granite        | Granite Springs Granite (zircon)   | 144.5473 | -28.3307 | 455.6 ± 5.4 | Mag. | SHRIMP     | Cross et al. (2015)                            |
| (28) RJB3123          | Outcrop       | Granite        | Granite Springs Granite (monazite) | 144.5473 | -28.3307 | 453.1 ± 6.4 | Mag. | SHRIMP     | Cross et al. (2015)                            |
| (29) DPTH77b          | Outcrop       | Granodiorite   | Granite Springs Granite (zircon)   | 144.5533 | -28.3348 | 463 ± 11    | Mag. | SHRIMP     | Cross et al. (2015)                            |
| (30) RJB3127          | Outcrop       | Granite        | Currawinya Granite                 | 144.4687 | -28.7800 | 381.5 ± 2.4 | Mag. | SHRIMP     | Cross et al. (2015)                            |
| (31) RJB3130          | Outcrop       | Granite        | Eulo Granite                       | 145.0193 | -28.1699 | 385 ± 2.5   | Mag. | SHRIMP     | Cross et al. (2012)                            |
| (32) RJB3126          | Outcrop       | Granite        | Hungerford Granite                 | 144.4615 | -28.9958 | 419.1 ± 2.5 | Mag. | SHRIMP     | Cross et al. (2015)                            |
| (33) TRI-RMD08-01     | 201.85–202.77 | Micromonzonite | Tinchelooka Diorite                | 144.9439 | -29.8390 | 401.8 ± 3.1 | Mag. | SHRIMP     | Bodorkos et al. (2013)                         |
| (34) GSQ Mitchell 1   | 767.5–770.5   | Metasediment   | Nebine Metamorphics                | 147.1178 | -26.4151 | 520 ± 10    | MDA  | SHRIMP     | Kositcin et al. (2015)                         |
| (35) AOP Scalby 1     | 859–860       | Granite        | Scalby Granite                     | 147.3970 | -26.8634 | 368.4 ± 2.5 | Mag. | SHRIMP     | Kositcin et al. (2015)                         |
| (36) Louth DH L2      | 139.3–139.6   | Metasediment   | Louth Volcanics                    | 145.1916 | -30.8059 | 422 ± 4     | MDA  | LA-ICP-MS  | Glen et al. (2010; 2013)                       |
| (37) BH7b             |               | Metasediment   | Louth Volcanics                    | 144.8870 | -30.2777 | 431 ± 15    | MDA  | LA-ICP-MS  | Dwyer et al. (2018, this issue)                |
| (38) BH7b             |               | Gabbro         | Louth Volcanics                    | 144.8870 | -30.2777 | 243 ± 5.6   | Mag. | LA-ICP-MS  | Dwyer et al. (2018, this issue)                |
| (39) BH5              |               | Volcaniclastic | Louth Volcanics                    | 144.9947 | -30.4099 | 260 ± 4.3   | MDA  | LA-ICP-MS  | Dwyer et al. (2018, this issue)                |
| (40) BH5              |               | Sandstone      | Louth Volcanics                    | 144.9947 | -30.4099 | 249 ± 4.2   | MDA  | LA-ICP-MS  | Dwyer et al. (2018, this issue)                |
| (41) T-1              |               | Volcaniclastic | Louth Volcanics                    | 145.4781 | -30.3434 | 261 ± 8.9   | MDA  | LA-ICP-MS  | Dwyer et al. (2018, this issue)                |
| (42) T-1              |               | Gabbro         | Louth Volcanics                    | 145.4781 | -30.3434 | 261 ± 8.2   | Mag. | LA-ICP-MS  | Dwyer et al. (2018, this issue)                |
| (43) MDH1             |               | Gabbro         | Louth Volcanics                    | 145.3600 | -30.4986 | 242 ± 7.9   | Mag. | LA-ICP-MS  | Dwyer et al. (2018, this issue)                |
| (44) DH5/6-1          |               | Volcaniclastic | Louth Volcanics                    | 145.2804 | -30.4068 | 241 ± 8.1   | MDA  | LA-ICP-MS  | Dwyer et al. (2018, this issue)                |
| (45) DH6/7-1          |               | Monzodiorite   | Louth Volcanics                    | 145.4712 | -30.2540 | 280 ± 120   | Mag. | LA-ICP-MS* | Dwyer et al. (2018, this issue)                |
| (46) L21RMD10-01      |               | Dolerite       | Louth Volcanics                    | 145.3044 | -30.4711 | 414 ± 9.3   | Mag. | LA-ICP-MS  | Dwyer et al. (2018, this issue)                |
| (47) L21RMD10-01      |               | Volcaniclastic | Louth Volcanics                    | 145.3044 | -30.4711 | 411 ± 6.3   | Mag. | LA-ICP-MS  | Dwyer et al. (2018, this issue)                |

| Drill hole/sample no. | Depth (m)    | Rock type                   | Unit                 | Long.    | Lat.     | Age (Ma)    | Type | Method    | Reference                       |
|-----------------------|--------------|-----------------------------|----------------------|----------|----------|-------------|------|-----------|---------------------------------|
| (48) L30RMD10-01      |              | Volcaniclastic              | Louth Volcanics      | 145.1132 | -30.6231 | 402 ± 5.2   | MDA  | LA-ICP-MS | Dwyer et al. (2018, this issue) |
| (49) L33RMD10-01      |              | Gabbro                      | Louth Volcanics      | 145.1436 | -30.6415 | 458 ± 9.7   | MDA  | LA-ICP-MS | Dwyer et al. (2018, this issue) |
| (50) L33RMD10-01      |              | Volcaniclastic              | Louth Volcanics      | 145.1436 | -30.6415 | 482 ± 5.4   | MDA  | LA-ICP-MS | Dwyer et al. (2018, this issue) |
| (51) RDT7             | Outcrop      | Metasediment                | Louth Volcanics      | 145.2449 | -30.3926 | 484 ± 8     | MDA  | LA-ICP-MS | Dwyer et al. (2018, this issue) |
| (52) ACDWE009         | 162.5–163.3  | Metavolcaniclastic sediment | Warraweena Volcanics | 146.2856 | -29.9429 | 504 ±       | MDA  | LA-ICP-MS | Glen et al. (2010; 2013)        |
| (53) OXCOPJG0014      | Outcrop      | Metasediment                | Gumbercoo zone?      | 146.2397 | -30.1920 | 495 ± 9     | MDA  | SHRIMP    | Fraser et al. (2014)            |
| (54) OXCOSJT0861.01A  | Outcrop      | Metasediment                | Gumbercoo zone?      | 146.2444 | -30.2000 | 501 ± 7     | MDA  | SHRIMP    | Fraser et al. (2014)            |
| (55) DDHT14A          | 247.2–262.6  | Metasediment                | Gumbercoo zone?      | 146.1810 | -30.0810 | 491.3 ± 2.9 | MDA  | LA-ICP-MS | Hack et al. (2018, this issue)  |
| (56) SW027            | Outcrop      | Metasediment                | Gumbercoo zone?      | 146.2480 | -30.1680 | 441 ± 4.9   | MDA  | LA-ICP-MS | Hack et al. (2018, this issue)  |
| (57) DDHT14A          | 226.6–226.7  | Volcanic                    | Gumbercoo zone?      | 146.1810 | -30.0810 | 411 ± 4.5   | Dep. | LA-ICP-MS | Hack et al. (2018, this issue)  |
| (58) DDHT14B          | 135.4–136    | Metasediment                | Gumbercoo zone?      | 146.1810 | -30.0880 | 442 ± 17    | MDA  | LA-ICP-MS | Hack et al. (2018, this issue)  |
| (59) DDH T17          | 163.28–166.9 | Metasediment                | Gumbercoo zone?      | 146.1627 | -30.0856 | 438 ± 9     | MDA  | SHRIMP    | Fraser et al. (2014)            |
| (60) ACDWE008         |              | Volcanic                    | Warraweena Volcanics | 146.2880 | -29.9397 | 414 ± 4     | Dep. | LA-ICP-MS | Hack et al. (2018, this issue)  |
| (61) ACDWE009         |              | Volcanic                    | Warraweena Volcanics | 146.2856 | -29.9429 | 417 ± 3.5   | Dep. | LA-ICP-MS | Hack et al. (2018, this issue)  |

Notes:

Numbers in parentheses preceding drill hole/sample no. correspond to reference numbers used in figures

MDA = Maximum depositional age

Mag. = Magmatic age

Dep. = Depositional age

\* = LA-ICP-MS apatite age

## References

- Armistead, S. E., & Fraser, G. L. (2015). *New SHRIMP U–Pb zircon ages from the Cuttaburra and F1 prospects, southern Thomson Orogen, New South Wales* (Record 2015/20). Canberra, ACT: Geoscience Australia.
- Black, L. P. (2006). *SHRIMP U–Pb zircon ages obtained during 2005/06 for NSW Geological Survey Projects (Report GS2006/821)*. Maitland, NSW: Geological Survey of New South Wales.
- Black, L. P. (2007). *SHRIMP U–Pb zircon ages obtained during 2006/07 for NSW Geological Survey Projects (Report GS2007/298)*. Maitland, NSW: Geological Survey of New South Wales.
- Bodorkos, S., Blevin, P. L., Simpson, C. J., Gilmore, P. J., Glen, R. A., Greenfield, J., ... Quinn, C. D. (2013). *New SHRIMP U–Pb zircon ages from the Lachlan, Thomson and Delamerian orogens, New South Wales: July 2009–June 2010* (Record 2013/29). Canberra: Geoscience Australia, and (Report GS2013/0427) Maitland NSW: Geological Survey of New South Wales.
- Brunker, R. L. (1968). *Explanatory notes of the Bourke 1:250 000 Geological Sheet SH/55-10*. Sydney, NSW: Geological Survey of New South Wales.
- Cross, A., Purdy, D., Champion, D., & Brown, D. (2018). Insights to the evolution of the Thomson Orogen and nature of the deeper crust from geochronology, geochemistry and zircon isotopic studies of magmatic rocks. *Australian Journal of Earth Sciences*, 65, this issue.
- Cross, A. J., Dunkley, D. J., Bultitude, R. J., Brown, D. D., Purdy, D. J., Withnall, I. W., ... Blake, P. R. (2015). *Summary of results Joint GSQ–GA geochronology project: Thomson Orogen, New England Orogen and Mount Isa region, 2010–2012* (Queensland Geological Record 2015/01). Brisbane, QLD: Geological Survey of Queensland.
- Draper, J. J. (2006). The Thomson Fold Belt in Queensland revisited. In: Australian Earth Sciences Convention, Melbourne, Australia, 2–6 July 2006, Extended abstracts. Geological Society of Australia, Abstracts, on CD.
- Dwyer, R. C., Collins, W. J., Hack, A. C., Hegarty, R., & Huang, H. (2018). Age and tectonic significance of the Louth Volcanics: Implications for the evolution of the Tasmanides of eastern Australia. *Australian Journal of Earth Sciences*, 65, this issue.
- Fraser, G. L., Gilmore, P. J., Fitzherbert, J. A., Trigg, S. J., Campbell, L. M., Deyssing, L., ... Simpson, C. J. (2014). *New SHRIMP U–Pb zircon ages from the Lachlan, southern Thomson and New England orogens, New South Wales: February 2011–June 2013* (Record 2014/53). Canberra, ACT: Geoscience Australia, (Report GS2014/0829). Maitland, NSW: Geological Survey of New South Wales.
- Glen, R. A., Korsch, R. J., Hegarty, R., Saeed, A., Poudjom Djomani, Y., Costelloe, R. D., & Belousova, E. (2013). Geodynamic significance of the boundary between the Thomson Orogen and the Lachlan Orogen, northwestern New South Wales and implications for Tasmanide tectonics. *Australian Journal of Earth Sciences*, 60, 371–412.
- Glen, R. A., Saeed, A., Hegarty, R., Percival, I. G., Bodorkos, S., & Griffin, W. L. (2010). *Preliminary zircon data and tectonic framework for the Thomson Orogen, north-western NSW* (Report GS2010/0379). Maitland, NSW: Geological Survey of New South Wales.
- Hack, A. C., Dwyer, R. C., Phillips, G., Whalan, S., & Huang, H. (2018). The age Warraweena Volcanics, regionally related rocks, southern Thomson Orogen: Diachronous termination of oceanic arc magmatism in the Tasmanides? *Australian Journal of Earth Sciences*, 65, this issue.
- Kositcin, N., Purdy, D. J., Brown, D. D., Bultitude, R. J., & Carr, P. A. (2015). *Summary of Results — Joint GSQ–GA Geochronology Project: Thomson Orogen and Hodgkinson Province, 2012–2013* (Queensland Geological Record 2015/02). Brisbane, QLD: Geological Survey of Queensland.
- Purdy, D. J., Cross, A. J., Brown, D. D., Carr, P. A., & Armstrong, R. A. (2016). New constraints on the origin and evolution of the Thomson Orogen and links with central Australia from isotopic studies of detrital zircons. *Gondwana Research*, 39, 41–56.
- Siegel, C. (2015). *Heat-producing element enrichment in granitic rocks, the role of crustal composition and evolution* (Unpublished PhD thesis). Queensland University of Technology, Brisbane.
- Siégel, C., Bryan S. E., Allen C. M., Purdy D. J., Cross, A. J., Uysal, I.T., and Gust, D. A. (2018). Crustal and thermal structure of the Thomson Orogen: constraints from the geochemistry, zircon U–Pb age, and Hf and O isotopes of subsurface granitic rocks. *Australian Journal of Earth Sciences*, 65, this issue. <https://doi.org/10.1080/08120099.2018.1447998>
- Wong, S. C. T., Collins, W. J., Hack, A. C., & Huang, H. (2018). Provenance and structure of the Yancannia Formation, southern Thomson Orogen: Implications for the tectono-stratigraphic evolution of the Cambro-Ordovician western Tasmanides. *Australian Journal of Earth Sciences*, 65, this issue.
